# Supplementary material for: Transcriptome Sequencing and Developmental Regulation of Gene Expression in Anopheles aquasalis
Source: PLoS Negl Trop Dis. 2014 Jul 17;8(7):e3005. doi: 10.1371/journal.pntd.0003005 (PMC4102416; doi:10.1371/journal.pntd.0003005)
Supplement: Table S4 — Validation of Rp49 as housekeeping gene to normalize expression values of selected candidates. (XLSX) [file pntd.0003005.s008.xlsx]

## Sheet: Plan1
	Table S4. Validation of Rp49 as housekeeping gene to
	normalize expression values of selected candidates.
	Mean of Ct value (3 measurements by replicate)
	Rp49	L3/L4	Sucrose-fed	Blood-fed
	housekeeping	larvae pool	adult female	adult female
	Biological Replicate 1	18.22	17.78	17.74
	Biological Replicate 2	18.16	18.18	17.93
	Biological Replicate 3	18.03	18.09	17.93
	Mean	18.1367	18.0167	17.8667
	Stardard Deviation	0.0971253	0.209841	0.109697
